# Supplementary material
Source: publisher figshare collection journal article supplement (https://acs.figshare.com/ndownloader/files/5746275)
Supplement: Supplementary file 1 [file 5746275]

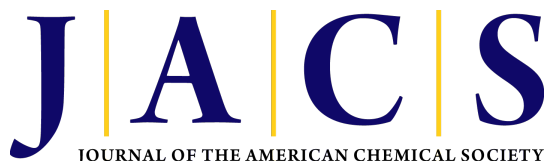

JOURNAL OF THE AMERICAN CHEMICAL SOCIETY

J. Am. Chem. Soc., 1996, 118(8), 2099-2100, DOI: [10.1021/ja952026+](https://doi.org/10.1021/ja952026+)

#### Terms & Conditions

Electronic Supporting Information files are available without a subscription to ACS Web Editions. The American Chemical Society holds a copyright ownership interest in any copyrightable Supporting Information. Files available from the ACS website may be downloaded for personal use only. Users are not otherwise permitted to reproduce, republish, redistribute, or sell any Supporting Information from the ACS website, either in whole or in part, in either machine-readable form or any other form without permission from the American Chemical Society. For permission to reproduce, republish and redistribute this material, requesters must process their own requests via the RightsLink permission system. Information about how to use the RightsLink permission system can be found at <http://pubs.acs.org/page/copyright/permissions.html>

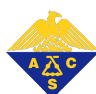

ACS Publications

MOST TRUSTED. MOST CITED. MOST READ.

Copyright © 1996 American Chemical Society

REVISED MANUSCRIPT (1/2/96)

J2100-1

## Supplementary Material

### Nickel-Catalyzed Cyclizations of Alkynyl Enones with Concomitant Stereoselective Tri- or Tetrasubstituted Alkene Introduction

John Montgomery\* and Alexey V. Savchenko

Department of Chemistry, Wayne State University, Detroit, MI 48202-3489

#### Experimental procedures.

Unless otherwise indicated, reagents were commercially available and were used without purification. All organolithium reagents were freshly titrated with 2,5-dimethoxybenzyl alcohol. Ni(COD)<sub>2</sub> was prepared from Ni(acac)<sub>2</sub> and 1,5-cyclooctadiene.<sup>1</sup> Alkynyl enone **6** was prepared by a Swern / Wittig sequence from 5-hexyn-1-ol. 1-Oxo-1,8-diphenyl-(2*E*)-octen-7-yne was prepared by a Sonogashira coupling<sup>2</sup> of alkynyl enone **6** with PhI in the presence of catalytic Pd(PPh<sub>3</sub>)<sub>4</sub> and CuI. 1-Oxo-1-phenyl-(2*E*)-dodecen-7-yne was prepared from 5-hexyn-1-ol by hydroxyl group silylation, alkylation, deprotection, Swern oxidation, and Wittig olefination. 3-(4-Pentynyl)-2-cyclohexen-1-one (**3**) was synthesized by the literature method.<sup>3</sup> Zinc chloride was dried at 150 °C at 0.1 mm and was stored in a glove box. All reactions were conducted in flame-dried glassware under a nitrogen or argon atmosphere.

*General Procedure for Cyclizations with Alkylation:* A 0.3-0.8 M solution of ZnCl<sub>2</sub> (2.2 equiv.) in THF was stirred at 0 °C, and the organolithium or Grignard reagent (3.3 equiv.) was added by syringe followed by stirring for 1 h at 0 °C. A 0.02-0.04 M THF solution of Ni(COD)<sub>2</sub> (0.04-0.10 equiv.) was added and resulting mixture was immediately transferred by cannula to a 0.2-0.6 M 0 °C THF solution of alkynyl-enone (1.0 equiv.). After stirring for 0.5-2.0 h at 0 °C, the reaction mixture was subjected to extractive work-up (NaHCO<sub>3</sub>/EtOAc) followed by flash chromatography on silica gel to afford pure products. Although the above procedure was typically used, pure salt-free organozincs performed comparably.

*General Procedure for Reductive Cyclizations:* A 0.3-0.5 M solution of ZnCl<sub>2</sub> (2.5 equiv.) in THF was stirred at 0 °C, and *n*-BuLi (3.75 equiv.) was added by syringe followed by stirring at 0 °C for 1 h. (Commercial Et<sub>2</sub>Zn (2.25 equiv.) may be used in place of the above mixture.) A 0.15 M solution of triphenylphosphine (0.2-0.5 equiv.) in THF was added to Ni(COD)<sub>2</sub> (0.04-0.10 equiv) at 25 °C. After 3 min, the nickel solution was transferred to the organozinc reagent, and the

J2100-2 2

resulting mixture was immediately transferred by cannula to a 0.2-0.5 M 0 °C THF solution of alkynyl-enone (1.0 equiv.). After stirring for 0.5-4.0 h at 0 °C the reaction mixture was subjected to extractive work-up (NaHCO<sub>3</sub>/EtOAc) followed by flash chromatography on silica gel to afford pure products.

**2-(2-Oxo-2-phenylethyl)-Z-1-ethylidenecyclopentane (1a):** Following the general procedure, 1-oxo-1-phenyl-(2*E*)-octen-7-yne (60 mg, 0.30 mmol), MeLi (0.92 mL, 1.10 mmol of a 1.2 M ethyl ether solution), zinc chloride (99 mg, 0.73 mmol) and Ni(COD)<sub>2</sub> (7 mg, 0.025 mmol) were employed to produce, after flash chromatography (35:1 hexanes:EtOAc), 53 mg (82%) of **1a** as a colorless oil that was homogeneous by TLC analysis. <sup>1</sup>H NMR (300 MHz, CDCl<sub>3</sub>) δ 7.96 (m, 2H), 7.40-7.60 (m, 3H), 5.35 (m, 1H), 3.26 (s, 1H), 3.09 (dd, *J* = 3.9, 16.5 Hz, 1H), 2.92 (dd, *J* = 10.2, 16.2 Hz, 1H), 2.15-2.45 (m, 2H), 1.93 (m, 1H), 1.62 (d, *J* = 6.6 Hz, 3H), 1.42-1.75 (m, 3H); <sup>13</sup>C NMR (75 MHz) δ 199.7, 146.7, 137.3, 132.9, 128.5, 128.0, 115.5, 43.1, 35.9, 33.3, 32.8, 24.1, 14.6; IR (film) 1687, 1597 cm<sup>-1</sup>; MS (EI) *m/e* calcd for C<sub>15</sub>H<sub>18</sub>O 214.1358, found 214.1358 (M<sup>+</sup>).

**2-(2-Oxo-2-phenylethyl)-Z-1-(*n*-pentylidene)cyclopentane (1b):** Following the general procedure, 1-oxo-1-phenyl-(2*E*)-octen-7-yne (0.10 g, 0.50 mmol), *n*-BuLi (0.58 mL, 1.4 mmol of a 2.43 M hexane solution), zinc chloride (0.75 mL, 0.75 mmol of a 1.0 M ether solution), and Ni(COD)<sub>2</sub> (6.9 mg, 0.025 mmol) were employed to produce, after flash chromatography (24:1 to 9:1 hexanes : EtOAc), in order of elution, 65 mg (51 %) of **1b** and 11 mg (11%) of **2a**, both as colorless oils that were homogeneous by TLC analysis. For **1b**: <sup>1</sup>H NMR (300 MHz, CDCl<sub>3</sub>) δ 7.97 (m, 2H), 7.40-7.60 (m, 3H), 5.27 (tq, *J* = 7.3, 1.9 Hz, 1H), 3.24 (m, 1H), 3.06 (dd, *J* = 3.8, 16.6 Hz, 1H), 2.94 (dd, *J* = 10.5, 16.6 Hz, 1H), 2.34 (m, 1H), 2.25 (m, 1H), 1.86-2.06 (m, 3H), 1.41-1.76 (m, 3H), 1.32 (m, 4H), 0.88 (m, 3H); <sup>13</sup>C NMR (75 MHz) δ 199.7, 145.5, 137.3, 132.9, 128.5, 128.0, 121.8, 43.6, 36.1, 33.2, 32.8, 32.2, 29.0, 24.0, 22.4, 14.0; IR (film) 1684, 1596, 1579; cm<sup>-1</sup>; MS (EI) *m/e* calcd for C<sub>18</sub>H<sub>24</sub>O 256.1827, found 256.1822 (M<sup>+</sup>). Anal. Calcd for C<sub>18</sub>H<sub>24</sub>O: C, 84.32; H, 9.44. Found: C, 84.16; H, 9.57. The alkene stereochemistry was assigned by observation of 1.3 % and 1.0 % NOE of the allylic ring methylene protons (δ 2.25 and 2.34) that are syn to the alkene proton upon irradiation of that alkene proton at δ 5.27. Assignments were confirmed by homonuclear decoupling experiments.

**2-(2-Oxo-2-phenylethyl)-Z-1-benzylidenecyclopentane (1c):** Following the general procedure, 1-oxo-1-phenyl-(2*E*)-octen-7-yne (43.5 mg, 0.22 mmol), PhMgBr (1.10 mL, 1.10 mmol of a 1.0 M THF solution), zinc chloride (98 mg, 0.72 mmol) and Ni(COD)<sub>2</sub> (5.5 mg, 0.020 mmol) were

J2100-3

3

employed to produce, after flash chromatography (21:1 hexanes:EtOAc), 37 mg (61%) of **1c** as a white crystalline solid that was recrystallized from hexanes / ether: mp. 96-97 °C,  $^1\text{H}$  NMR (500 MHz,  $\text{CDCl}_3$ )  $\delta$  7.80 (m, 2H), 7.55 (m, 1H), 7.38 (m, 2H), 7.28 (m, 4H), 7.15 (m, 1H), 6.44 (m, 1H), 3.76 (m, 1H), 3.07 (dd,  $J$  = 3.0, 17.0 Hz, 1H), 2.86 (dd,  $J$  = 11.5, 17.0 Hz, 1H), 2.59 (m, 1H), 2.53 (m, 1H), 2.05 (dq,  $J$  = 12.8, 7.8 Hz, 1H), 1.71 (m, 2H), 1.58 (m, 1H);  $^{13}\text{C}$  NMR (125 MHz)  $\delta$  199.7, 149.8, 138.0, 137.1, 132.9, 128.5, 128.03, 128.01, 126.1, 121.6, 41.7, 36.5, 36.0, 33.5, 23.4; IR (KBr) 1673, 1593  $\text{cm}^{-1}$ ; MS (EI)  $m/e$  calcd for  $\text{C}_{20}\text{H}_{20}\text{O}$ : 276.1514, found: 276.1510 ( $\text{M}^+$ ). The alkene stereochemistry was assigned by observation of 1.4 % and 1.3 % NOE of the allylic ring methylene protons ( $\delta$  2.53 and 2.59) that are syn to the alkene proton upon irradiation of that alkene proton at  $\delta$  6.44. Assignments were confirmed by homonuclear decoupling experiments.

*2-(2-Oxo-2-phenylethyl)-Z-1-(3-butenylidene)cyclopentane (1d)*: Following the general procedure, 1-oxo-1-phenyl-(2*E*)-octen-7-yne (60 mg, 0.30 mmol), vinylmagnesium bromide (1.05 ml, 1.05 mmol of a 1.0 M THF solution), zinc chloride (95 mg, 0.70 mmol) and  $\text{Ni}(\text{COD})_2$  (6 mg, 0.021 mmol) were employed to produce, after flash chromatography (25:1 pentane:Et<sub>2</sub>O), in order of elution, 10.5 mg of **1d** as a yellow oil and 35 mg of mixture of **1d** and **2a** (6:1 molar ratio based on  $^1\text{H}$  NMR integration.) Total combined yield of **1d**: 41 mg, 59 %. For **1d**:  $^1\text{H}$  NMR (500 MHz,  $\text{CDCl}_3$ )  $\delta$  7.96 (m, 2H), 7.56 (tt,  $J$  = 1.5, 7.5 Hz, 1H), 7.46 (m, 2H), 6.46 (dt,  $J$  = 10.5, 17.0 Hz, 1H), 5.99 (dd,  $J$  = 2.0, 11.0 Hz, 1H), 5.07 (dd,  $J$  = 1.0, 17.0 Hz, 1H), 4.97 (d,  $J$  = 10.0 Hz, 1H), 3.45 (m, 1H), 3.00-3.10 (m, 2H), 2.42-2.52 (m, 1H), 2.28-2.38 (m, 1H), 1.95 (m, 1H), 1.67 (m, 2H), 1.49-1.55 (m, 1H);  $^{13}\text{C}$  NMR (125 MHz)  $\delta$  199.3, 150.7, 137.1, 133.9, 133.0, 128.6, 128.1, 122.0, 114.9, 43.9, 36.5, 33.6, 32.8, 23.8; IR (film) 1685, 1652, 1597, 1581  $\text{cm}^{-1}$ ; MS (EI)  $m/e$  calcd for  $\text{C}_{16}\text{H}_{18}\text{O}$  226.1358, found 226.1354 ( $\text{M}^+$ ).

*2-(2-Oxo-2-phenylethyl)-E-1-(1-phenylpentylidene)cyclopentane (1e)*: Following the general procedure, 1-oxo-1,8-diphenyl-(2*E*)-octen-7-yne (53 mg, 0.19 mmol), *n*-BuLi (0.41 mL, 0.83 mmol of a 2.03 M hexane solution), zinc chloride (68 mg, 0.50 mmol), and  $\text{Ni}(\text{COD})_2$  (6.9 mg, 0.025 mmol) were employed to produce, after flash chromatography (49:1 hexanes : EtOAc), in order of elution, 43 mg (68 %) of **1e** and 4.0 mg (8 %) of **2b**, both as colorless oils that were homogeneous by TLC analysis. For **1e**:  $^1\text{H}$  NMR (300 MHz,  $\text{CDCl}_3$ )  $\delta$  8.00-8.20 (m, 2H), 7.57-7.60 (m, 1H), 7.48-7.51 (m, 2H), 7.30-7.33 (m, 2H), 7.19-7.23 (m, 1H), 7.13-7.14 (m, 2H), 3.46 (m, 1H), 3.13 (dd,  $J$  = 4.0, 16.5 Hz, 1H), 3.07 (dd,  $J$  = 10.0, 16.5 Hz, 1H), 2.38 (t,  $J$  = 7.0 Hz, 2H), 2.16-2.24 (m, 1H), 2.08-2.14 (m, 1H), 1.87-1.94 (m, 1H), 1.52-1.71 (m, 3H), 1.16-1.28 (m, 4H), 0.80 (t,  $J$  = 7.3 Hz, 3H);  $^{13}\text{C}$  NMR (75 MHz)  $\delta$  199.7, 143.6, 142.3,

J2100-4

4

137.4, 133.7, 133.0, 128.6, 128.3, 128.1, 127.9, 125.9, 43.7, 37.7, 34.6, 32.4, 31.4, 30.8, 24.0, 22.8, 14.0; IR (film) 1686, 1598, 1580  $\text{cm}^{-1}$ ; MS (EI)  $m/e$  calcd for  $\text{C}_{24}\text{H}_{28}\text{O}$  332.2140, found 332.2135 ( $\text{M}^+$ ). The alkene stereochemistry was assigned by observation of 7.6 % NOE of the cyclopentyl ring methine proton ( $\delta$  3.46) and 2.9 % and 0.8 % NOE's of the two diastereotopic protons  $\alpha$  to the carbonyl ( $\delta$  3.13 and 3.07, respectively) upon irradiation of the allylic protons in the butyl group ( $\delta$  2.38). Assignments were confirmed by homonuclear decoupling experiments.

*2-(2-Oxo-2-phenylethyl)-Z-1-(1-phenylpentylidene)cyclopentane (1f)*: Following the general procedure, 1-oxo-1-phenyl-(2*E*)-dodecen-7-yne (69 mg, 0.27 mmol),  $\text{PhMgBr}$  (1.05 ml, 1.05 mmol of a 1.0 M THF solution), zinc chloride (95 mg, 0.70 mmol) and  $\text{Ni(COD)}_2$  (6 mg, 0.021 mmol) were employed to produce, after flash chromatography (50:1 pentane: $\text{Et}_2\text{O}$ ) 34 mg (38%) of **1f** as colorless glass that was homogeneous by TLC analysis.  $^1\text{H}$  NMR (500 MHz,  $\text{CDCl}_3$ )  $\delta$  7.18-7.46 (m, 10H), 3.09 (m, 1H), 2.83 (dd,  $J$  = 4.0, 14.5 Hz, 1H), 2.45-2.54 (m, 1H), 2.35-2.45 (m, 2H), 2.33 (dd,  $J$  = 12.0, 14.0 Hz, 1H), 2.26 (m, 1H), 1.76-1.87 (m, 1H), 1.62-1.76 (m, 2H), 1.49-1.57 (m, 1H), 1.22-1.35 (m, 4H), 0.86 (m, 3H);  $^{13}\text{C}$  NMR (125 MHz)  $\delta$  200.1, 143.6, 142.2, 136.4, 134.3, 132.5, 128.8, 128.6, 128.4, 128.2, 126.2, 42.8, 39.0, 36.1, 31.1, 30.2, 29.8, 23.6, 22.6, 14.1; IR (film) 1678, 1597, 1580  $\text{cm}^{-1}$ ; MS (EI)  $m/e$  calcd for  $\text{C}_{24}\text{H}_{28}\text{O}$  332.2140, found 332.2139 ( $\text{M}^+$ ).

*2-(2-Oxo-2-phenylethyl)methylidenecyclopentane (2a)*: Following the general procedure, 1-oxo-1-phenyl-(2*E*)-octen-7-yne (51 mg, 0.26 mmol),  $\text{Et}_2\text{Zn}$  (74 mg, 0.061 ml, 0.60 mmol), zinc chloride (27 mg, 0.20 mmol),  $\text{PPh}_3$  (37 mg, 0.14 mmol) and  $\text{Ni(COD)}_2$  (6 mg, 0.021 mmol) were employed to produce, after flash chromatography (20:1 pentane: $\text{Et}_2\text{O}$ ), 48 mg (92%) of **2a** as a colorless oil that was homogeneous by TLC analysis.  $^1\text{H}$  NMR (500 MHz,  $\text{CDCl}_3$ )  $\delta$  7.97 (m, 2H), 7.56 (m, 1H), 7.47 (m, 2H), 4.93 (d,  $J$  = 2.0 Hz, 1H), 4.82 (d,  $J$  = 2.0 Hz, 1H), 3.24 (dd,  $J$  = 3.5, 15.5 Hz, 1H), 2.93-3.04 (m, 2H), 2.30-2.47 (m, 2H), 2.05 (dq,  $J$  = 4.5, 12.0 Hz, 1H), 1.73 (m, 1H), 1.61 (m, 1H), 1.31 (m, 1H);  $^{13}\text{C}$  NMR (125 MHz)  $\delta$  199.8, 155.9, 137.2, 133.0, 128.6, 128.1, 104.7, 43.6, 39.8, 33.4, 33.0, 24.1; IR (film) 1686, 1652, 1595, 1580  $\text{cm}^{-1}$ ; MS (EI)  $m/e$  calcd for  $\text{C}_{14}\text{H}_{16}\text{O}$ : 200.1201, found: 200.1207 ( $\text{M}^+$ ).

*2-(2-Oxo-2-phenylethyl)-E-1-benzylidenecyclopentane (2b)*: Following the general procedure, 1-oxo-1,8-diphenyl-(2*E*)-octen-1-yne (49 mg, 0.18 mmol),  $n\text{-BuLi}$  (0.40 mL, 0.80 mmol of a 2.00 M hexane solution), zinc chloride (68 mg, 0.50 mmol),  $\text{Ni(COD)}_2$  (6.9 mg, 0.025 mmol), and triphenylphosphine (52 mg, 0.20 mmol) were employed to produce, after flash chromatography (49:1 hexanes :  $\text{EtOAc}$ ), in order of elution, 23 mg (47 %) of **2b** and 11 mg (19 %) of **1e**, both as

J2100-5

5

colorless oils that were homogeneous by TLC analysis. For **2b**:  $^1\text{H}$  NMR (300 MHz,  $\text{CDCl}_3$ )  $\delta$  8.01 (m, 2H), 7.59 (m, 1H), 7.48 (m, 2H), 7.32 (m, 4H), 7.19 (m, 1H), 6.31 (q,  $J = 2.5$  Hz, 1H), 3.34 (dd,  $J = 4.8, 16.3$  Hz, 1H), 3.24 (m, 1H), 3.08 (dd,  $J = 8.75, 16.3$  Hz, 1H), 2.58-2.74 (m, 2H), 2.05 (m, 1H), 1.88 (m, 1H), 1.71 (m, 1H), 1.37 (m, 1H);  $^{13}\text{C}$  NMR (75 MHz)  $\delta$  199.7, 149.4, 138.5, 137.3, 133.0, 128.6, 128.20, 128.17, 128.14, 126.0, 121.1, 44.1, 42.0, 32.5, 31.5, 24.9; IR (KBr) 1681, 1644, 1594, 1578  $\text{cm}^{-1}$ ; MS (EI)  $m/e$  calcd for  $\text{C}_{20}\text{H}_{20}\text{O}$  276.1514, found 276.1517 ( $\text{M}^+$ ).

*2-(2-Oxo-2-phenylethyl)-E-1-(n-pentalidene)cyclopentane (2c)*: Following the general procedure, 1-oxo-1-phenyl-(2*E*)-dodecen-7-yne (70 mg, 0.28 mmol), *n*-BuLi (0.42 ml, 1.05 mmol of a 2.5 M hexanes solution), zinc chloride (95 mg, 0.70 mmol),  $\text{PPh}_3$  (34 mg, 0.13 mmol) and  $\text{Ni}(\text{COD})_2$  (6 mg, 0.021 mmol) were employed to produce, after flash chromatography (42:1 pentane: $\text{Et}_2\text{O}$ ), in order of elution, 14 mg (16%) of **1g** and 41 mg (58%) of **2c**, both as colorless oils that were homogeneous by TLC analysis. For **2c**:  $^1\text{H}$  NMR (500 MHz,  $\text{CDCl}_3$ )  $\delta$  7.97 (m, 2H), 7.55 (tt,  $J = 1.5, 7.5$  Hz, 1H), 7.46 (m, 2H), 5.18 (m, 1H), 3.19 (dd,  $J = 4.5, 16.0$  Hz, 1H), 2.94 (m, 1H), 2.88 (dd,  $J = 9.0, 15.5$  Hz, 1H), 2.16-2.36 (m, 2H), 1.92-2.02 (m, 3H), 1.75 (m, 1H), 1.53-1.63 (m, 1H), 1.20-1.35 (m, 5H), 0.89 (m, 3H);  $^{13}\text{C}$  NMR (125 MHz)  $\delta$  200.2, 145.3, 137.4, 132.9, 128.5, 128.1, 120.6, 43.9, 40.2, 33.3, 31.8, 29.2, 28.9, 24.0, 22.4, 14.0; IR (film) 1688, 1597, 1581  $\text{cm}^{-1}$ ; MS (EI)  $m/e$  calcd for  $\text{C}_{18}\text{H}_{24}\text{O}$  256.1827, found 256.1823 ( $\text{M}^+$ ).

*2-(2-Oxo-2-phenylethyl)-1-(1-butylpentalidene)cyclopentane (1g)*:  $^1\text{H}$  NMR (500 MHz,  $\text{CDCl}_3$ )  $\delta$  7.95 (m, 2H), 7.55 (tt,  $J = 1.5, 7.5$  Hz, 1H), 7.46 (m, 2H), 3.28 (app q,  $J = 7.0$  Hz, 1H), 2.92 (m, 2H), 2.32 (m, 1H), 2.23 (m, 1H), 2.05 (m, 1H), 1.97 (m, 3H), 1.69 (m, 3H), 1.51-1.56 (m, 1H), 1.20-1.40 (m, 8H), 0.91 (m, 3H), 0.87 (m, 3H);  $^{13}\text{C}$  NMR (125 MHz)  $\delta$  200.0, 139.3, 137.4, 132.9, 131.8, 128.5, 128.1, 43.3, 37.5, 32.3, 32.1, 30.8, 30.3, 29.3, 23.5, 23.04, 22.95, 14.15, 14.11; IR (film) 1687, 1597, 1581  $\text{cm}^{-1}$ ; MS (EI)  $m/e$  calcd for  $\text{C}_{22}\text{H}_{32}\text{O}$  312.2453, found 312.2458 ( $\text{M}^+$ ).

*Z-1-Ethylidenespiro[4.5]decane-7-one (4a)*: Following the general procedure, 3-(4-pentynyl)-2-cyclohexen-1-one (70 mg, 0.43 mmol), MeLi (1.72 ml, 1.5 mmol of a 0.87 M ethyl ether solution), zinc chloride (0.136 g, 1.0 mmol) and  $\text{Ni}(\text{COD})_2$  (11.5 mg, 0.042 mmol) were employed to produce, after flash chromatography (4:1 hexanes: $\text{EtOAc}$ ), 55.5 mg (72%) of **4a** as a pale-yellow liquid that was homogeneous by TLC analysis.  $^1\text{H}$  NMR (500 MHz,  $\text{CDCl}_3$ )  $\delta$  5.39 (tq,  $J = 2.0, 7.5$  Hz, 1H), 2.78 (d,  $J = 14.0$  Hz, 1H), 2.25-2.38 (m, 5H), 2.17 (dt,  $J = 14.0, 2.0$  Hz, 1H), 1.95-2.03 (m, 1H), 1.76 (dt,  $J = 7.5, 2.0$  Hz, 3H), 1.70-1.80 (m, 1H), 1.44-1.64 (m, 5H);  $^{13}\text{C}$  NMR (125 MHz)  $\delta$  211.7, 148.0, 116.5, 50.1, 48.6, 41.3, 39.5, 36.3, 34.2, 23.3,

J2100-6

6

23.2, 13.9; IR (film) 1713, 1435  $\text{cm}^{-1}$ ; MS (EI)  $m/e$  calcd for  $\text{C}_{12}\text{H}_{18}\text{O}$  178.1358, found 178.1354 ( $\text{M}^+$ ).

*Z-1-Benzylidenespiro[4.5]decane-7-one (4b)*: Following the general procedure, 3-(4-pentynyl)-2-cyclohexen-1-one (74 mg, 0.46 mmol),  $\text{PhMgBr}$  (1.8 ml, 1.8 mmol of a 1.0 M THF solution), zinc chloride (0.163 g, 1.20 mmol) and  $\text{Ni(COD)}_2$  (11 mg, 0.040 mmol) were employed to produce, after flash chromatography (10:1 hexanes:EtOAc), in order of elution, 8 mg (7%) of compound **5b** as a white solid and 83 mg (76%) of **4b** as a colorless oil that were homogeneous by TLC analysis. For **4b**:  $^1\text{H}$  NMR (500 MHz,  $\text{CDCl}_3$ )  $\delta$  7.15-7.32 (m, 5H), 6.58 (s, 1H), 2.53 (m, 2H), 2.46 (d,  $J = 14.0$  Hz, 1H), 2.18 (doublet of sextet,  $J = 14.0, 2.2$  Hz, 1H), 2.10 (dt,  $J = 13.5, 2.5$  Hz, 1H), 1.90-2.00 (m, 1H), 1.78-1.90 (m, 2H), 1.50-1.70 (m, 6H);  $^{13}\text{C}$  NMR (125 MHz)  $\delta$  211.5, 150.6, 138.3, 129.2, 127.9, 126.4, 123.1, 51.5, 49.7, 41.0, 38.4, 35.9, 35.2, 22.9, 22.5; IR (film) 1714, 1492, 1445  $\text{cm}^{-1}$ ; MS (EI)  $m/e$  calcd for  $\text{C}_{17}\text{H}_{20}\text{O}$  240.1514, found 240.1506 ( $\text{M}^+$ ). The alkene stereochemistry was assigned by observation of 7.0% NOE of the allylic methylene protons ( $\delta$  2.53) upon irradiation of the alkene proton ( $\delta$  6.58) and 1.2% NOE of the axial proton  $\alpha$  to carbonyl group and spirocenter ( $\delta$  2.46) upon irradiation of the phenyl ring ortho-protons ( $\delta$  7.17). Assignments were confirmed by homonuclear decoupling experiments. *Compound 5b*:  $^1\text{H}$  NMR (500 MHz,  $\text{CDCl}_3$ )  $\delta$  7.18 (tt,  $J = 1.0, 7.5$  Hz, 1H), 7.10 (dt,  $J = 1.5, 7.5$  Hz, 1H), 7.05 (dd,  $J = 1.5, 7.5$  Hz, 1H), 6.80 (d,  $J = 7.5$  Hz, 1H), 6.28 (t,  $J = 2.0$  Hz, 1H), 3.47 (s, 1H), 2.66 (dt,  $J = 7.5, 13.5$  Hz, 1H), 2.52-2.61 (m, 1H), 2.41-2.50 (m, 1H), 2.34 (doublet of sextets,  $J = 14.0, 2.0$  Hz, 1H), 1.97 (ddd,  $J = 3.5, 6.5, 13.0$  Hz, 1H), 1.73-1.89 (m, 4H), 1.64 (ddt,  $J = 1.5, 4.5, 13.5$  Hz, 1H), 1.52 (m, 1H), 1.43 (m, 1H);  $^{13}\text{C}$  NMR (125 MHz)  $\delta$  214.0, 152.0, 134.2, 131.3, 127.4, 126.8, 126.6, 126.0, 118.2, 62.0, 49.8, 38.6, 35.4, 29.5, 27.3, 23.0, 22.5; IR (KBr) 1704, 1656, 1479  $\text{cm}^{-1}$ ; MS (EI)  $m/e$  calcd for  $\text{C}_{17}\text{H}_{18}\text{O}$  238.1358, found 238.1359 ( $\text{M}^+$ ).

*Z-1-(n-Pentylidene)spiro[4.5]decane-7-one (4c)*: Following the general procedure, 3-(4-pentynyl)-2-cyclohexen-1-one (78 mg, 0.48 mmol),  $n\text{-BuLi}$  (0.90 ml, 1.8 mmol of a 2.0 M hexanes solution), zinc chloride (0.163 g, 1.2 mmol) and  $\text{Ni(COD)}_2$  (11 mg, 0.040 mmol) were employed to produce, after flash chromatography (10:1 hexanes:EtOAc), 64 mg (60%) of **4c** as a pale-yellow oil that was homogeneous by TLC analysis.  $^1\text{H}$  NMR (500 MHz,  $\text{CDCl}_3$ )  $\delta$  5.28 (tt,  $J = 2.0, 7.5$  Hz, 1H), 2.72 (d,  $J = 14.0$  Hz, 1H), 2.26-2.39 (m, 4H), 2.13-2.23 (m, 4H), 1.98 (m, 1H), 1.75 (m, 1H), 1.45-1.65 (m, 5H), 1.33 (m, 4H), 0.90 (m, 3H);  $^{13}\text{C}$  NMR (125 MHz)  $\delta$  211.7, 146.9, 123.2, 50.7, 48.6, 41.3, 39.5, 36.4, 34.8, 32.6, 28.0, 23.4, 23.3, 22.5, 14.1; IR (film) 1715, 1451  $\text{cm}^{-1}$ ; MS (EI)  $m/e$  calcd for  $\text{C}_{15}\text{H}_{24}\text{O}$  220.1827, found 220.1824 ( $\text{M}^+$ ).

J2100-7 7

*Cyclization of 1-oxo-1-phenyl-(2E)-octene-7-yne with Diethylzinc-d<sub>10</sub>*: *t*-BuLi (3.6 ml of a 1.39 M pentane solution, 5.0 mmol) was added over 15 minutes dropwise by syringe drive to a 4.5 ml -78 °C Et<sub>2</sub>O solution of CD<sub>3</sub>CD<sub>2</sub>I (0.402 g, 0.200 ml, 2.50 mmol). After stirring for 15 minutes at -78 °C the mixture was allowed to warm to room temperature with stirring for 1 h. The organolithium solution was re-cooled to -78 °C, and a 2 ml THF solution of ZnCl<sub>2</sub> (0.205 g, 1.50 mmol) was added. The resulting solution was allowed to warm to 0 °C with stirring for 1 h. Ni(COD)<sub>2</sub> (4.5 mg, 0.016 mmol) was treated with a 1 ml THF solution of PPh<sub>3</sub> (22 mg, 0.084 mmol). After 3 minutes of stirring the brown-red solution was transferred to the organozinc reagent, and the resulting mixture was immediately transferred by cannula to a 0 °C, 0.5 ml THF solution of 1-oxo-1-phenyl -(2E)-octene-7-yne (74 mg, 0.37 mmol). After stirring for 5 h at 0 °C, the reaction mixture was quenched with 40 ml of saturated NaHCO<sub>3</sub>, extracted with EtOAc (3x40 ml), dried with Na<sub>2</sub>SO<sub>4</sub>, filtered, and concentrated. Flash chromatography (silica gel, pentane/Et<sub>2</sub>O 25:1) afforded 48 mg (65%) of **2d** as a colorless oil that was homogeneous by TLC analysis. In comparison to the spectral data of **2a**, in the <sup>1</sup>H NMR spectrum (500 MHz), the alkene proton signal at δ 4.82 displayed an integration corresponding to 32 % of one proton. This signal was assigned by observation of 1.6 % NOE of this alkene proton (δ 4.82) upon irradiation of the α proton to the carbonyl (δ 3.24) and 1.0 % NOE of the other alkene proton (δ 4.92) upon irradiation of the allylic ring methylene protons (δ 2.30-2.47) on an undeuterated sample of **2a**. In the <sup>13</sup>C spectrum (125 MHz), a signal at δ 104.4 (t, J = 24 Hz) was apparent for the deuterated component **4d**. MS (EI) *m/e* (% rel inten): 199 (0.09), 200 (0.45), 201 (0.80), 202 (0.16).

### References

- (1) Krysan, D. J.; Mackenzie, P. B. *J. Org. Chem.* **1990**, *55*, 4229.
- (2) Sonogashira, K.; Tohda, Y.; Hagihara, N. *Tetrahedron Lett.* **1975**, 4467.
- (3) Sidduri, A.; Rozema, M. J.; Knochel, P. *J. Org. Chem.* **1993**, *58*, 2694.
